# Supplementary material for: Stable Transcriptional Repression and Parasitism of HIV-1
Source: PubMed Central journal article supplement (PMC6019856; doi:10.1016/j.omtn.2018.04.011), 2018-05-01
Supplement: mmc1.pdf [file mmc1.pdf]

**OMTN, Volume 12**

## **Supplemental Information**

### **Stable Transcriptional Repression**

### **and Parasitism of HIV-1**

**Surya Shrivastava, Paige Charlins, Amanda Ackley, Heather Embree, Boro Dropulic, Ramesh Akkina, Marc S. Weinberg, and Kevin V. Morris**

## Supplemental materials and methods for “Stable transcriptional repression and parasitism of HIV”

### Supplemental figures:

Figure S1

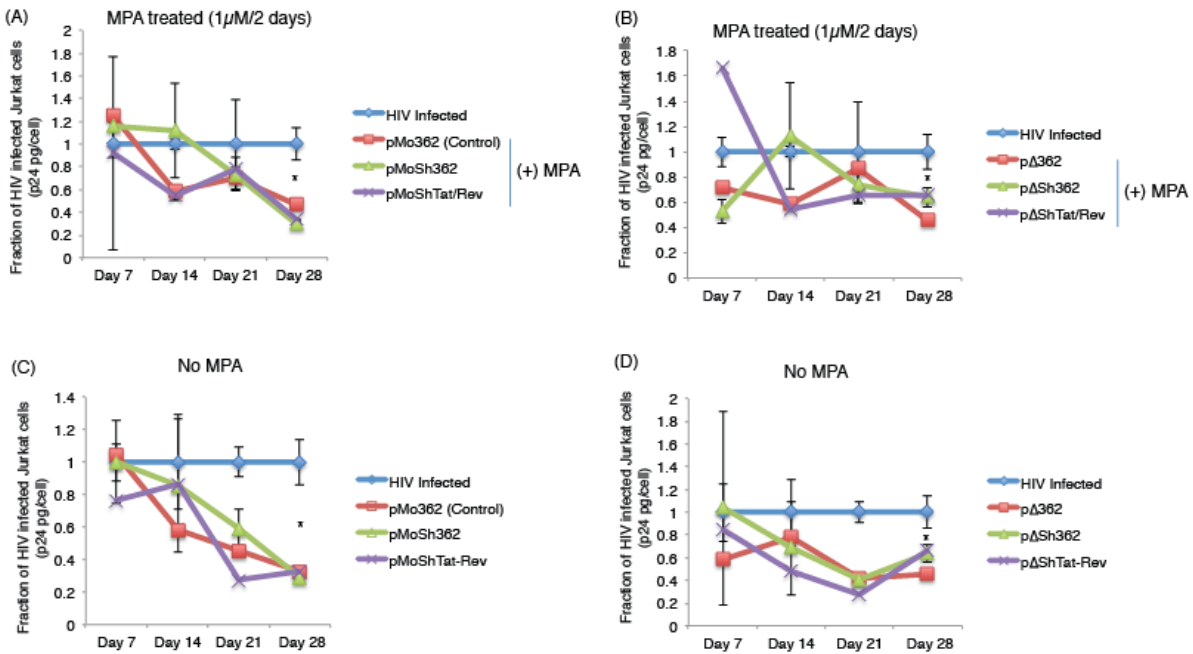

**Figure S1** CR-Vector directed suppression of HIV in Jurkat cells. Jurkat cells were infected with HIV NL4-3 (MOI=0.01) and 48hrs later transduced with vector (MOI=5.0). The cultures were expanded for 48hrs and then split into 2 groups, one group treated with MPA every 2-3 days (panels A-B) and other group remained untreated (panels C-D). The cultures were followed for 28 days.

Figure S2

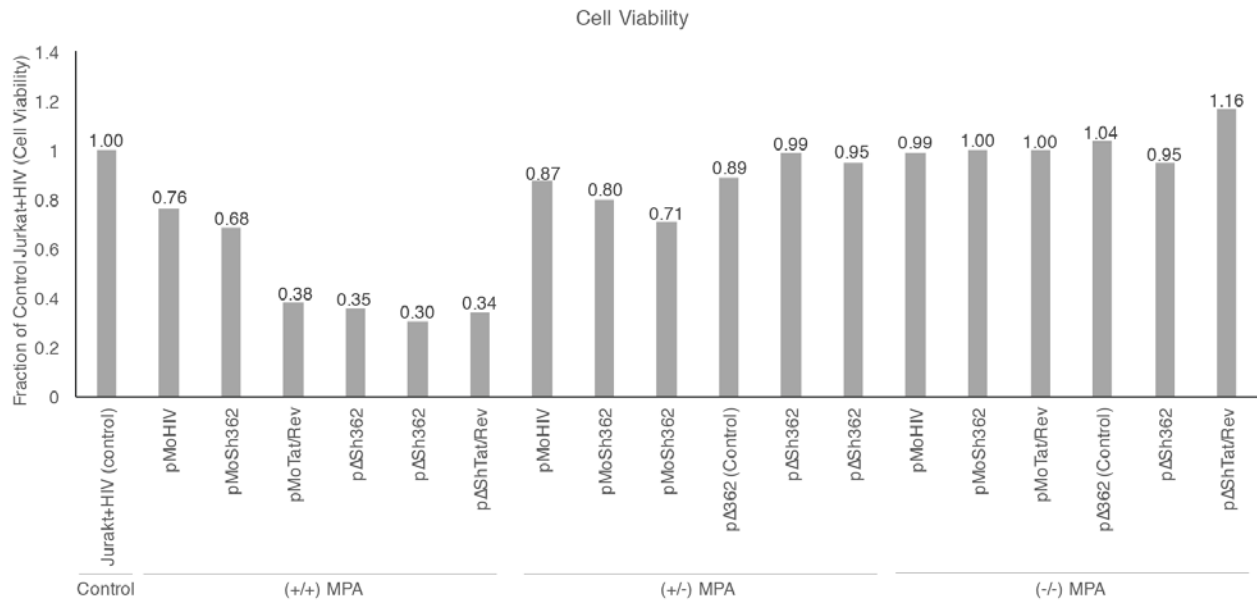

**Figure S2** Cell viability in transduced differential MPA treated and serially passaged cultures. The cell viability was determined on day 14 for those differentially treated cells shown in Figure 2H. Single measurements are shown from the various cell populations.

Figure S3

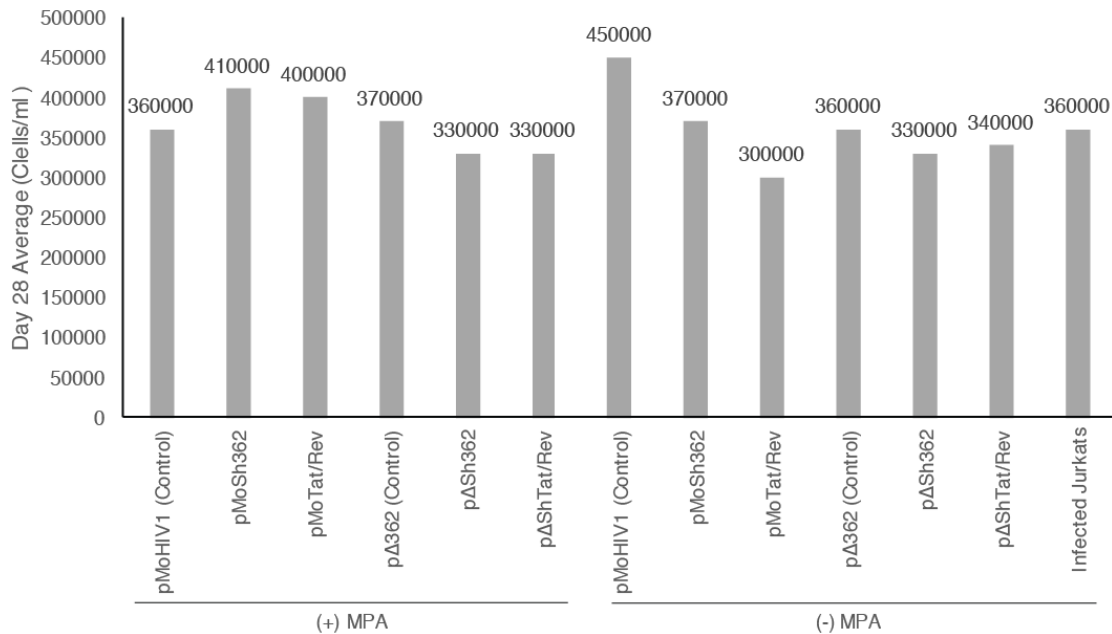

**Figure S3** Cell numbers at day 28 CR-vector treatment. The average cells were determined 28 days post-CR-vector treatment in HIV infected CR-vector treated Jurkat cells.

**Table S1** Oligonucleotide used in the following study.

| Name                     | Sequence (5'-3')                | Function (new name)                 |
|--------------------------|---------------------------------|-------------------------------------|
| GFP F2                   | GACAACCACTACCTGAGCAC            | GFP (vector specific)               |
| GFP R2                   | CAGGACCATGTGATCGCG              | GFP (vector specific)               |
| p128 (HIV F)             | AGGGATGGAAAGGATCACCAGCAA        | HIV specific                        |
| p129 (HIV R)             | CCCACCTCAACAGATGTTGTCTCA        | HIV specific                        |
| p172 ( $\beta$ -actin F) | AGGTCATCACCATTGGCAATGAG         | $\beta$ -actin (house keeping gene) |
| p173 ( $\beta$ -actin R) | TCTTTGCGGATGTCCACGTC            | $\beta$ -actin (house keeping gene) |
| HIV_F1                   | ACG AGG ATT GTG GAA CTT CTG GGA | HIV specific                        |
| HIV_R1                   | TGG CAT TGA GCA AGC TAA CAG CAC | HIV specific                        |
| Surveyor LTR F           | GAGAACAACAGCTTGTTACACCCTATGA    | LTR-362 specific                    |
| Surveyor LTR R           | CTGCGTCGAGAGATCTCCTCTGGCT       | LTR-362 specific                    |
| NF $\kappa$ B LTR_F      | TTTCCGCTGGGGACTTTCCAG           | LTR-362 site WT sequence specific   |
| Nuc1 LTR_R               | ACTCAAGGCAAGCTTTATTGAGGC        | LTR nuc1 H3K27me3 site              |
